# Supplementary material for: The Effect of the Duration of Basic Life Support Training on the Learners' Cardiopulmonary and Automated External Defibrillator Skills
Source: PubMed Central journal article supplement (PMC4978818; doi:10.1155/2016/2420568), 2016-07-27
Supplement: 2420568.f1.pdf [file 2420568.f1.pdf]

**Supplemental Table 1: Comparing cardiopulmonary resuscitation among novice participants according to program level**

| Quality variables during CPR                        | Program level          |                        |                        |                        | P-value          |                  |            |
|-----------------------------------------------------|------------------------|------------------------|------------------------|------------------------|------------------|------------------|------------|
|                                                     | 1 (n = 73)             | 2 (n = 85)             | 3 (n = 78)             | 4 (n = 73)             | Between 1 and 2† | Between 3 and 4† | Among 1–4‡ |
| No. of total compressions                           | 224.0<br>(206.5-237.0) | 217.0<br>(195.5-231.0) | 142.0<br>(127.7-151.0) | 137.0<br>(121.0-150.0) | 0.118            | 0.289            | <0.001     |
| Average compression rate (per min)                  | 122.0<br>(113.0-130.5) | 121.0<br>(109.5-126.0) | 120.5<br>(113.0-126.3) | 117.0<br>(111.5-123.5) | 0.194            | 0.263            | 0.27       |
| Average compression depth (mm)                      | 49.0<br>(44.0-54.5)    | 51.0<br>(45.0-55.0)    | 51.0<br>(44.0-56.0)    | 55.0<br>(48.0-58.0)    | 0.436            | 0.029            | 0.019*     |
| Proportion of adequate compression depth (%)        | 38.6<br>(16.3-90.4)    | 58.5<br>(17.2-94.7)    | 50.7<br>(7.3-93.9)     | 80.2<br>(22.6-98.2)    | 0.249            | 0.065            | 0.143      |
| Proportion of adequate recoil (%)                   | 100.0<br>(99.5-100.0)  | 100.0<br>(99.5-100.0)  | 100.0<br>(100.0-100.0) | 100.0<br>(100.0-100.0) | 0.439            | 0.255            | 0.148      |
| Proportion of overall adequate compression (%)      | 25.4<br>(1.3-76.1)     | 32<br>(7.5-78.2)       | 29.8<br>(2.4-67.8)     | 56.7<br>(9.8-88.9)     | 0.351            | 0.008            | 0.049      |
| No. of mouth-to-mouth breaths                       | -                      | -                      | 8.0<br>(8.0-9.3)       | 8.0<br>(8.0-10.0)      | -                | 0.242            | -          |
| Average ventilation volume (mL)                     | -                      | -                      | 572.5<br>(288.5-846.8) | 574.0<br>(313.0-858.5) | -                | 0.848            | -          |
| Proportion of adequate mouth-to-mouth breathing (%) | -                      | -                      | 25.0<br>(0-50.0)       | 14.3<br>(0-40.0)       | -                | 0.163            | -          |
| Hands off time (s)                                  | 15.0<br>(13.0-17.0)    | 15.0<br>(12.0-18.0)    | 51.0<br>(47.0-56.0)    | 50.0<br>(46.0-55.0)    | 0.436            | 0.081            | <0.001     |

† Post hoc paired comparisons between the levels were performed using the Mann-Whitney U test with Bonferroni corrections (statistical significance was  $p < 0.0083$ ).

‡ Calculated using the Kruskal-Wallis method.

\* Post hoc paired comparisons between levels 1 and 4 ( $p < 0.003$ )

## Appendix 1: AED performance check list

### AED Performance Check list

UNIT NO.

◆ Instructor Profile

|      |  |     |       |      |         |
|------|--|-----|-------|------|---------|
| Name |  | Sex | M / F | Date | 2015... |
|------|--|-----|-------|------|---------|

◆ 1-Rescuer Adult AED skill Check list

| Skill Steps           | Core skill performed - AED                                | Performed Correctly (√) |
|-----------------------|-----------------------------------------------------------|-------------------------|
| 1                     | Turn on the AED first                                     |                         |
| 2                     | Correct location of AED pads                              |                         |
| 3                     | Clear during analysis                                     |                         |
| 4                     | Clear before shock                                        |                         |
| 5                     | Immediate chest compression after shock (within 1 second) |                         |
| 6                     | Time from AED arrival until shock                         | sec                     |
| Instructor's Decision | Pass / Fail                                               | Signature:              |

Korean Association of Cardiopulmonary Resuscitation
